# Supplementary material
Source: publisher site journal article supplement (https://www.spandidos-publications.com/2972/downloadSupplementary)
Supplement: Supplementary file 2 [file downloadSupplementary]

## Sheet: Sheet1
The enriched signaling pathways of common DEGs using the KEGG PATHWAY and Reactome online dataset
Category	Term	Count	%	P-value	Genes	List Total	Pop Hits	Pop Total	Fold Enrichment	Bonferroni	Benjamini	FDR
KEGG_PATHWAY	hsa00350:Tyrosine metabolism	4	8.69565	0.00017165	MAOA, ALDH1A3, AOX1, ADH1A	23	35	6910	34.3354	0.0127924	0.0127924	0.180001
KEGG_PATHWAY	hsa00982:Drug metabolism - cytochrome P450	4	8.69565	0.00122786	MAOA, ALDH1A3, AOX1, ADH1A	23	68	6910	17.6726	0.088028	0.0450277	1.28116
REACTOME_PATHWAY	R-HSA-5661231:R-HSA-5661231 Metallothioneins bind metals	2	4.34783	0.034614	MT1M, MT1X	30	11	9075	55	0.959469	0.959469	31.8899
KEGG_PATHWAY	hsa00360:Phenylalanine metabolism	2	4.34783	0.0528272	MAOA, ALDH1A3	23	17	6910	35.3453	0.982932	0.742528	43.4251
REACTOME_PATHWAY	R-HSA-5365859:R-HSA-5365859 RA biosynthesis pathway	2	4.34783	0.0680698	ALDH1A3, ADH1A	30	22	9075	27.5	0.998364	0.959548	53.6318
KEGG_PATHWAY	hsa00340:Histidine metabolism	2	4.34783	0.0708278	MAOA, ALDH1A3	23	23	6910	26.1248	0.995952	0.747766	53.744
KEGG_PATHWAY	hsa05202:Transcriptional misregulation in cancer	3	6.52174	0.098882	ID2, FOXO1, ZBTB16	23	168	6910	5.36491	0.999594	0.790239	66.4702
